# Supplementary material
Source: publisher site journal article supplement (https://www.dovepress.com/article/546959)
Supplement: Supplementary file 1 [file Supplementary%20file.docx]

**Supplementary Table 1 Correlation between V50%~V100% of bladder and the incidence of ≥grade 2 RT-induced acute and late GU toxicity**

| ≥ grade 2  GU toxicity | | Bladder | | | | | | |
| --- | --- | --- | --- | --- | --- | --- | --- | --- |
| V50* | V65 | V75 | | V80 | V90 | V100 |
| Acute | ROC curve | 0.779 | 0.814 | 0.843 | 0.866 | | 0.946 | 0.941 |
| *P* value | <0.001 | <0.001 | <0.001 | <0.001 | | <0.001 | <0.001 |
| Late | ROC curve | 0.776 | 0.813 | 0.850 | 0.874 | | 0.906 | 0.904 |
| *P* value | 0.037 | 0.018 | 0.008 | 0.005 | | 0.002 | 0.003 |

*Vx values (percentage volume receiving at least x% of the prescription dose)


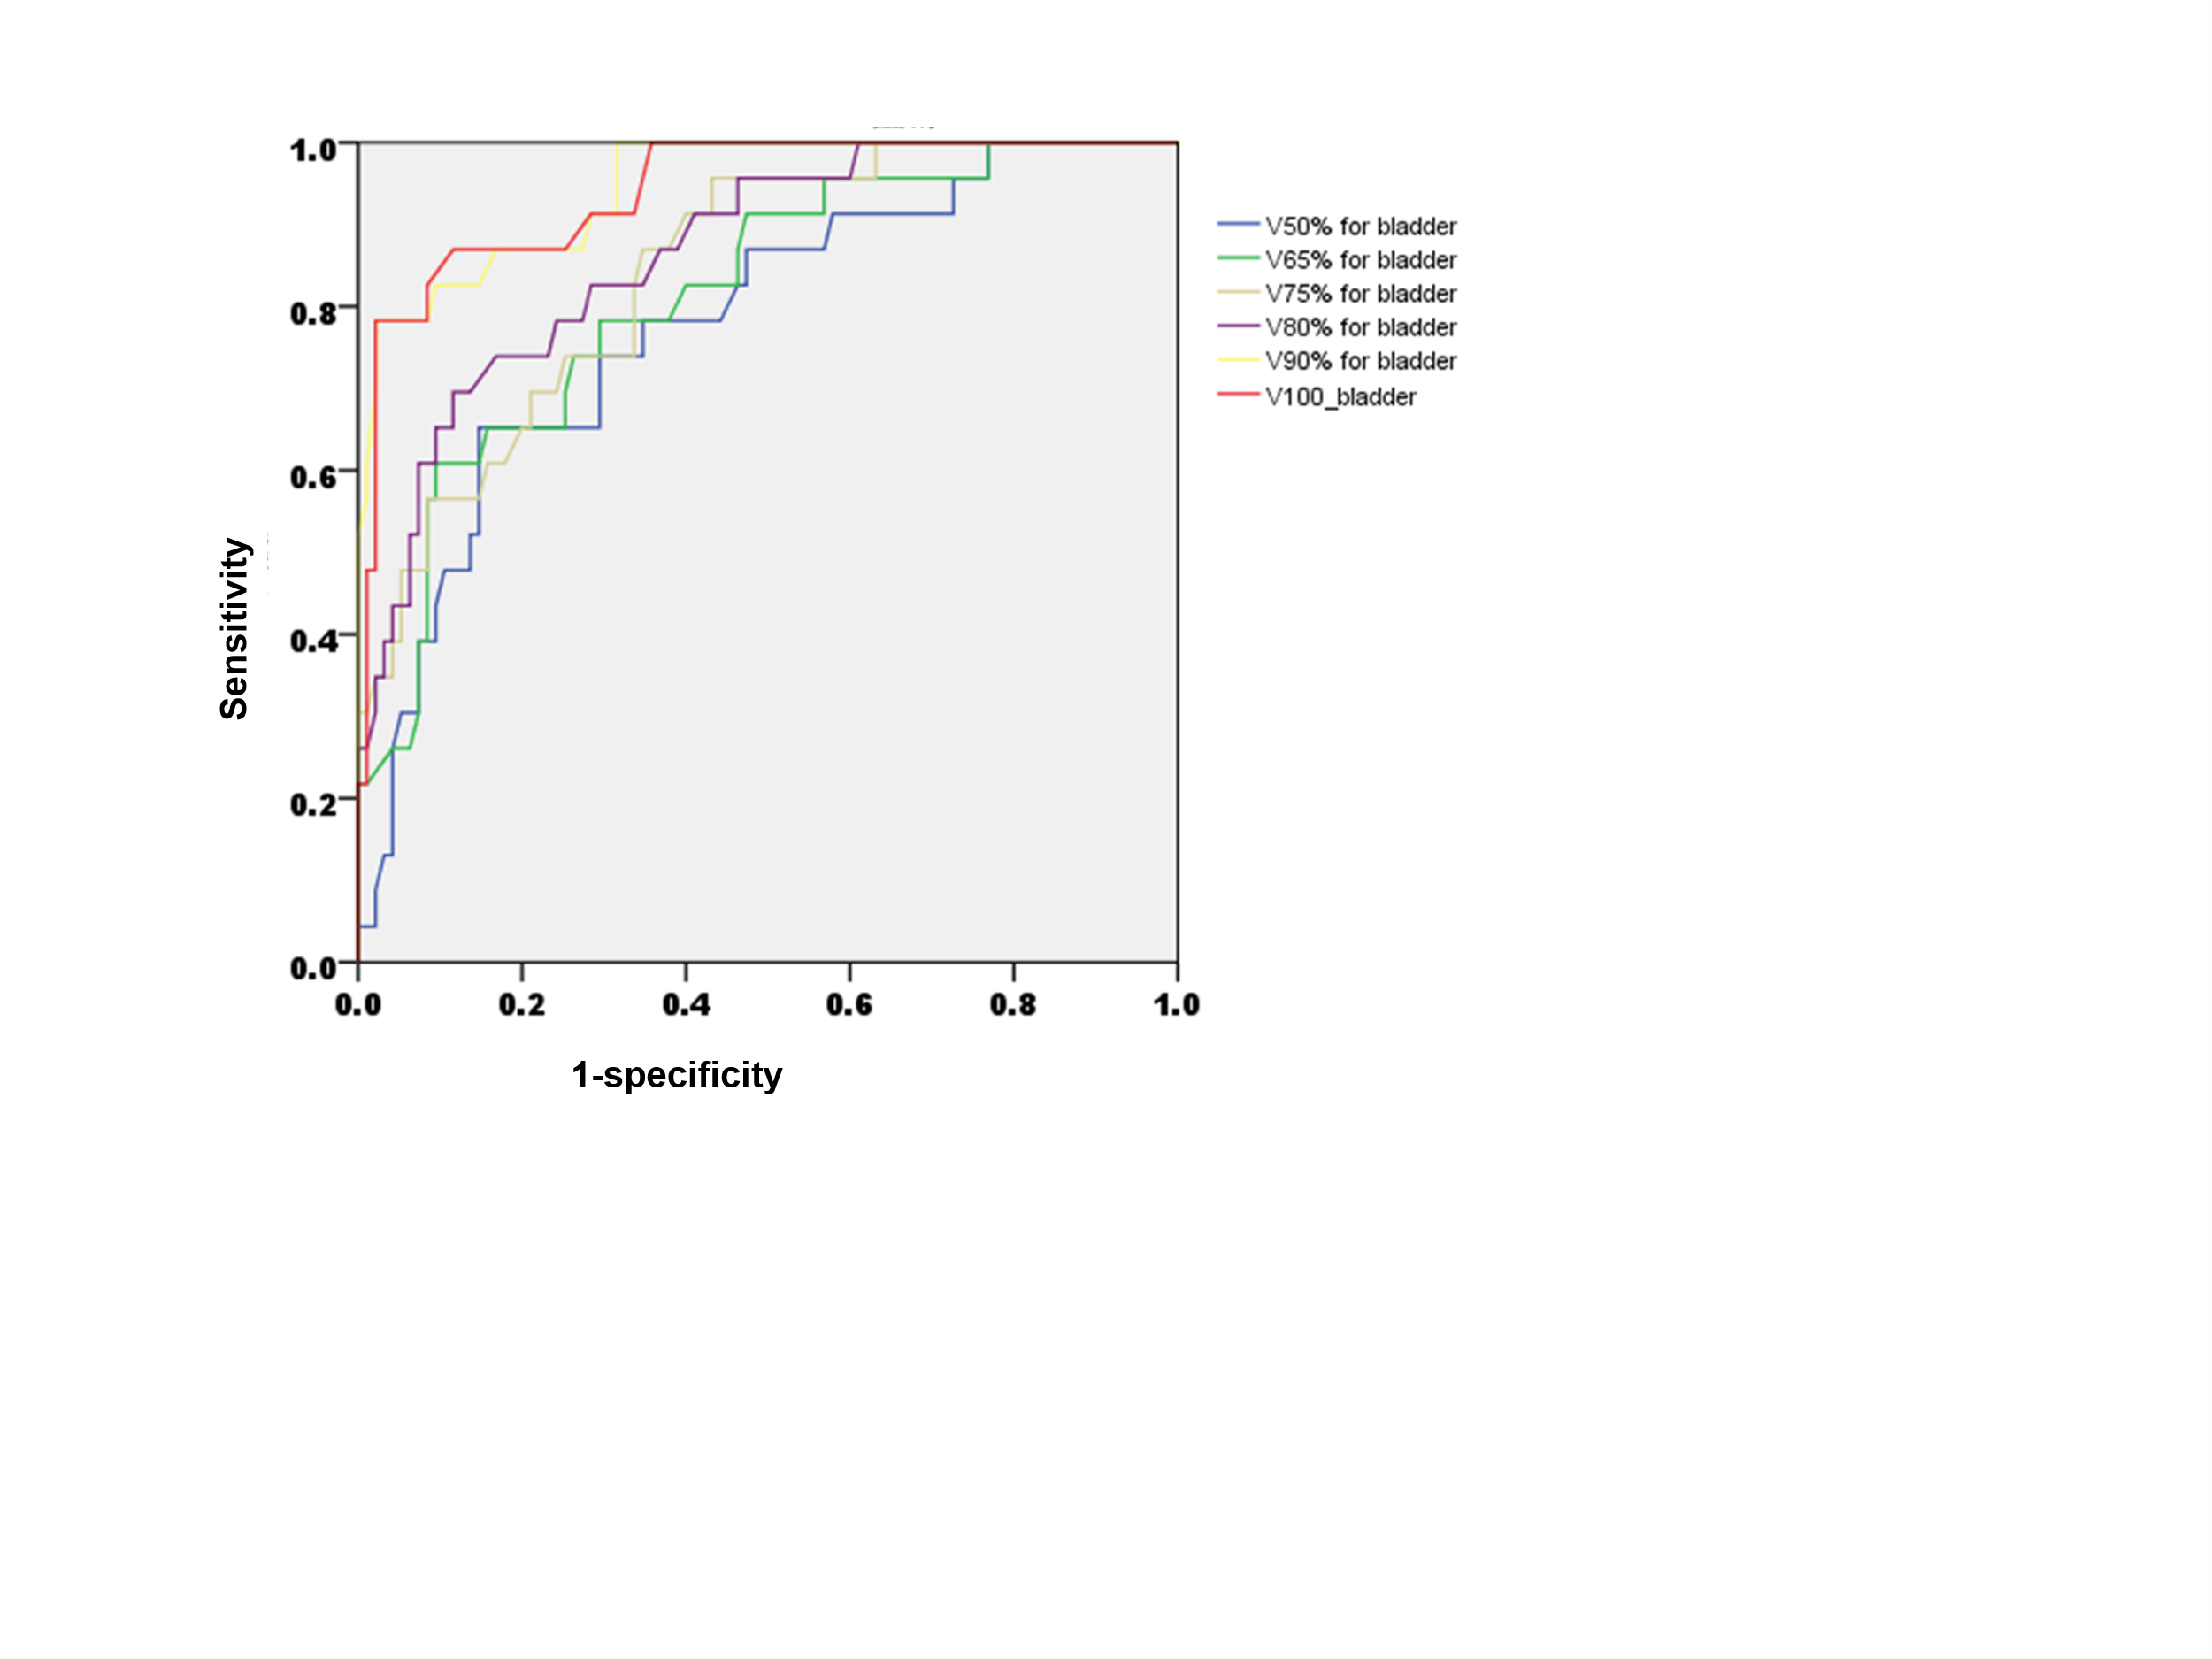


**Supplementary Figure 1** the ROC curves for V50%~V100% of bladder to predict ≥grade 2 RT-induced acute GU toxicity
